# Supplementary material
Source: PubMed Central journal article supplement (PMC2834171)

Figure S1

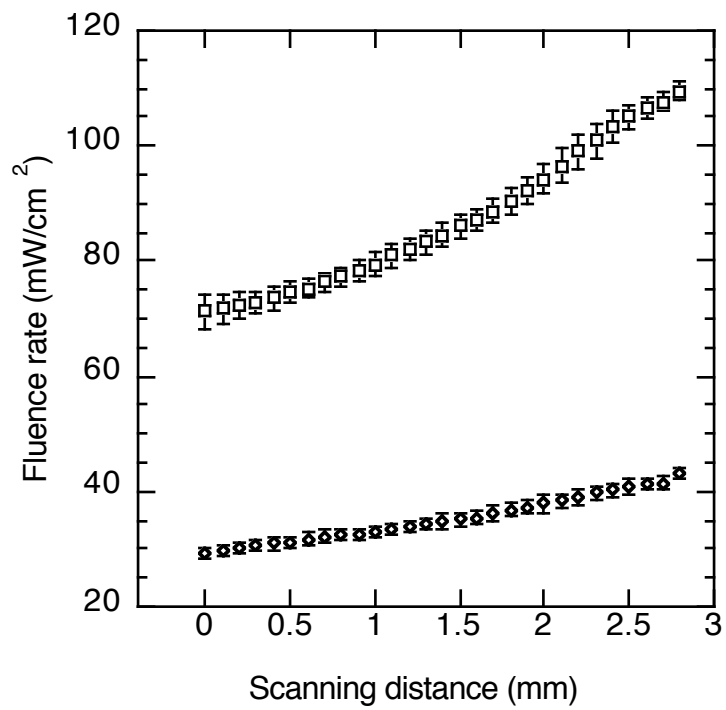

Figure S2

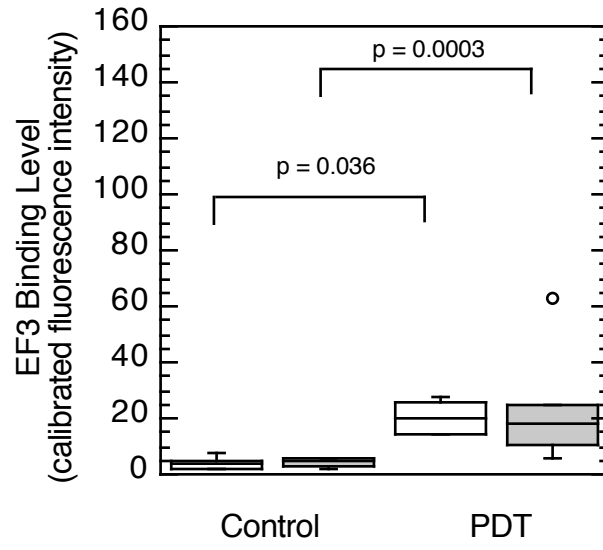

Supplement: NIHMS171939-supplement-supplement_1.pdf [file NIHMS171939-supplement-supplement_1.pdf]
